# Supplementary material for: A series of five-coordinated copper coordination polymers for efficient degradation of organic dyes under visible light irradiation
Source: Royal Society of Chemistry journal article supplement (doi:10.1039/c7ra03268d), 2017-01-01
Supplement: c7ra03268d1.pdf [file c7ra03268d1.pdf]

## **Electronic Supplementary Information**

### **A series of five-coordinated copper coordination polymers for efficient degradation of organic dyes under visible light irradiation**

Lu-Lu Shi, Tian-Rui Zheng, Min Li, Lin-Lu Qian, Bao-Long Li\*, Hai-Yan Li  
*State and Local Joint Engineering Laboratory for Functional Polymeric Materials,  
College of Chemistry, Chemical Engineering and Materials Science, Soochow  
University, Suzhou 215123, P.R. China.*

**Table S1.** Crystallographic data for **1**, **2**, **3**, **4** and **5**.

|                                             | <b>1</b>                                                                       | <b>2</b>                                                                      | <b>3</b>                                                                      | <b>4</b>                                                                      | <b>5</b>                                                                      |
|---------------------------------------------|--------------------------------------------------------------------------------|-------------------------------------------------------------------------------|-------------------------------------------------------------------------------|-------------------------------------------------------------------------------|-------------------------------------------------------------------------------|
| Formula                                     | C <sub>50</sub> H <sub>54</sub> Cu <sub>4</sub> N <sub>8</sub> O <sub>19</sub> | C <sub>32</sub> H <sub>26</sub> Cu <sub>2</sub> N <sub>4</sub> O <sub>8</sub> | C <sub>34</sub> H <sub>30</sub> Cu <sub>2</sub> N <sub>4</sub> O <sub>8</sub> | C <sub>36</sub> H <sub>34</sub> Cu <sub>2</sub> N <sub>4</sub> O <sub>9</sub> | C <sub>38</sub> H <sub>39</sub> Cu <sub>2</sub> N <sub>8</sub> O <sub>1</sub> |
| Fw                                          | 1325.17                                                                        | 721.65                                                                        | 749.70                                                                        | 793.75                                                                        | 910.85                                                                        |
| T/K                                         | 223(2)                                                                         | 223(2)                                                                        | 293(2)                                                                        | 223(2)                                                                        | 253(2)                                                                        |
| Crystal system                              | Triclinic                                                                      | Triclinic                                                                     | Triclinic                                                                     | Monoclinic                                                                    | Triclinic                                                                     |
| Space group                                 | $P\bar{1}$                                                                     | $P\bar{1}$                                                                    | $P\bar{1}$                                                                    | $C2/c$                                                                        | $P\bar{1}$                                                                    |
| $a/\text{\AA}$                              | 10.1526(11)                                                                    | 10.8971(5)                                                                    | 9.4520(6)                                                                     | 10.2620(3)                                                                    | 9.7731(6)                                                                     |
| $b/\text{\AA}$                              | 11.2399(8)                                                                     | 10.9070(6)                                                                    | 12.2857(8)                                                                    | 21.1852(5)                                                                    | 9.8545(7)                                                                     |
| $c/\text{\AA}$                              | 11.9600(13)                                                                    | 13.6446(4)                                                                    | 13.6945(10)                                                                   | 15.7859(4)                                                                    | 22.5635(9)                                                                    |
| $\alpha$ (°)                                | 88.231(7)                                                                      | 78.060(4)                                                                     | 93.448(6)                                                                     | 90                                                                            | 86.079(4)                                                                     |
| $\beta$ (°)                                 | 88.556(9)                                                                      | 77.934(3)                                                                     | 94.362(6)                                                                     | 97.520(3)                                                                     | 88.972(4)                                                                     |
| $\gamma$ (°)                                | 82.101(7)                                                                      | 79.380(4)                                                                     | 94.392(5)                                                                     | 90                                                                            | 68.582(6)                                                                     |
| $V/\text{\AA}^3$                            | 1350.9(2)                                                                      | 1534.64(12)                                                                   | 1577.52(19)                                                                   | 3402.37(15)                                                                   | 2018.2(2)                                                                     |
| $F(000)$                                    | 674                                                                            | 736                                                                           | 768                                                                           | 1624                                                                          | 938                                                                           |
| $Z$                                         | 1                                                                              | 2                                                                             | 4                                                                             | 4                                                                             | 2                                                                             |
| $\rho_{\text{calcd}}$ (g cm <sup>-3</sup> ) | 1.629                                                                          | 1.562                                                                         | 1.578                                                                         | 1.550                                                                         | 1.499                                                                         |
| $\mu$ (mm <sup>-1</sup> )                   | 1.636                                                                          | 1.444                                                                         | 1.408                                                                         | 2.072                                                                         | 1.123                                                                         |
| Reflections collected                       | 10946                                                                          | 13595                                                                         | 15119                                                                         | 6089                                                                          | 19921                                                                         |
| Unique reflections                          | 5754 (R(int) = 0.0468)                                                         | 6571 [R(int) = 0.0372]                                                        | 6799 [R(int) = 0.0335]                                                        | 2999 [R(int) = 0.0316]                                                        | 8636 [R(int) = 0.0412]                                                        |
| Parameter                                   | 394                                                                            | 417                                                                           | 435                                                                           | 286                                                                           | 535                                                                           |
| Goodness of fit                             | 1.004                                                                          | 1.052                                                                         | 1.021                                                                         | 1.044                                                                         | 1.091                                                                         |
| R <sub>1</sub> [I > 2σ(I)]                  | 0.0555                                                                         | 0.0401                                                                        | 0.0402                                                                        | 0.0460                                                                        | 0.0735                                                                        |
| wR <sub>2</sub> (all data)                  | 0.1362                                                                         | 0.0902                                                                        | 0.1008                                                                        | 0.1299                                                                        | 0.2084                                                                        |

**Table S2.** Selected bond lengths (Å) and angles (°) for **1**, **2**, **3**, **4** and **5**.

| <b>1</b>    |            |            |            |
|-------------|------------|------------|------------|
| Cu1-O1A     | 1.970(3)   | Cu1-O3B    | 1.953(3)   |
| Cu1-O7      | 1.877(3)   | Cu1-N1     | 1.986(4)   |
| Cu2-O2A     | 1.977(3)   | Cu2-O5     | 2.022(3)   |
| Cu2-O7      | 1.883(3)   | Cu2-O8     | 2.337(4)   |
| Cu2-N3C     | 1.965(4)   |            |            |
| O1A-Cu1-O3B | 84.64(14)  | O1A-Cu1-O7 | 92.24(14)  |
| O1A-Cu1-N1  | 158.67(16) | O3B-Cu1-O7 | 170.99(14) |
| O3B-Cu1-N1  | 89.86(15)  | O7-Cu1-N1  | 95.98(14)  |

|            |            |             |            |
|------------|------------|-------------|------------|
| O2A-Cu2-O5 | 178.23(14) | O2A-Cu2-O7  | 93.06(13)  |
| O2A-Cu2-O8 | 85.29(14)  | O2A-Cu2-N3C | 86.63(14)  |
| O5-Cu2-O7  | 88.46(12)  | O5-Cu2-O8   | 95.21(12)  |
| O5-Cu2-N3C | 91.67(14)  | O7-Cu2-O8   | 104.02(15) |
| O7-Cu2-N3C | 166.12(15) | O8-Cu2-N3C  | 89.78(16)  |

2

|             |            |             |            |
|-------------|------------|-------------|------------|
| Cu1-O1      | 1.9653(19) | Cu1-O2A     | 1.9948(18) |
| Cu1-O5      | 1.9724(17) | Cu1-O6A     | 1.9906(18) |
| Cu1-N1      | 2.129(2)   | Cu2-O3C     | 1.991(2)   |
| Cu2-O4D     | 1.989(2)   | Cu2-O7      | 1.9707(17) |
| Cu2-O8B     | 1.9706(16) | Cu2-N3      | 2.131(2)   |
| O1-Cu1-O2A  | 166.28(9)  | O1-Cu1-O5   | 86.23(9)   |
| O1-Cu1-O6A  | 88.51(9)   | O1-Cu1-N1   | 96.94(9)   |
| O2A-Cu1-O5  | 93.94(8)   | O2A-Cu1-O6A | 88.08(8)   |
| O2A-Cu1-N1  | 96.67(9)   | O5-Cu1-O6A  | 165.86(9)  |
| O5-Cu1-N1   | 96.54(9)   | O6A-Cu1-N1  | 97.12(8)   |
| O3B-Cu2-O4D | 166.69(9)  | O3B-Cu2-O7  | 89.43(9)   |
| O3B-Cu2-O8C | 90.76(9)   | O3B-Cu2-N3  | 89.99(9)   |
| O4D-Cu2-O7  | 88.86(9)   | O4D-Cu2-O8C | 87.72(8)   |
| O4D-Cu2-N3  | 103.30(9)  | O7-Cu2-O8C  | 165.90(8)  |
| O7-Cu2-N3   | 101.34(8)  | O8C-Cu2-N3  | 92.76(8)   |

3

|            |            |             |            |
|------------|------------|-------------|------------|
| Cu1-O1     | 1.978(2)   | Cu1-O2A     | 1.9834(19) |
| Cu1-O5     | 1.9910(19) | Cu1-O6A     | 1.965(2)   |
| Cu1-N2     | 2.149(2)   | Cu2-O3      | 2.373(3)   |
| Cu2-O4     | 1.934(2)   | Cu2-O7C     | 2.028(2)   |
| Cu2-O8B    | 1.964(2)   | Cu2-N4      | 1.945(3)   |
| O1-Cu1-O2A | 165.45(9)  | O1-Cu1-O5   | 88.56(10)  |
| O6A-Cu1-O1 | 88.79(10)  | O1-Cu1-N2   | 96.13(9)   |
| O2A-Cu1-O5 | 89.43(9)   | O6A-Cu1-O2A | 89.50(10)  |
| O2A-Cu1-N2 | 98.40(9)   | O6A-Cu1-O5  | 165.26(8)  |
| O5-Cu1-N2  | 94.38(9)   | O6A-Cu1-N2  | 100.32(9)  |
| O4-Cu2-O3  | 59.49(8)   | O7C-Cu2-O3  | 90.03(11)  |
| O8B-Cu2-O3 | 127.79(12) | N4-Cu2-O3   | 108.49(10) |
| O4-Cu2-O7C | 93.32(12)  | O4-Cu2-O8B  | 91.33(10)  |
| O4-Cu2-N4  | 167.38(10) | O8B-Cu2-O7C | 137.44(15) |
| N4-Cu2-O7C | 90.39(13)  | N4-Cu2-O8B  | 94.08(11)  |

4

|            |            |             |           |
|------------|------------|-------------|-----------|
| Cu1-O1     | 1.981(2)   | Cu1-O2A     | 1.996(2)  |
| Cu1-O3     | 1.962(2)   | Cu1-O4A     | 1.968(2)  |
| Cu1-N1     | 2.117(5)   |             |           |
| O1-Cu1-O2A | 166.11(11) | O1-Cu1-O3   | 87.95(11) |
| O1-Cu1-O4A | 92.02(12)  | O1-Cu1-N1   | 82.8(2)   |
| O2A-Cu1-O3 | 88.49(11)  | O2A-Cu1-O4A | 88.28(12) |

|             |            |            |            |
|-------------|------------|------------|------------|
| O2A-Cu1-N1  | 110.7(2)   | O3-Cu1-O4A | 166.29(9)  |
| O3-Cu1-N1   | 91.27(19)  | O4A-Cu1-N1 | 102.34(19) |
| <b>5</b>    |            |            |            |
| Cu1-O1      | 1.965(3)   | Cu1-O7     | 1.942(3)   |
| Cu1-O9      | 2.294(5)   | Cu1-N4A    | 1.971(4)   |
| Cu1-N7      | 2.008(4)   | Cu2-O3     | 2.129(4)   |
| Cu2-O5B     | 1.990(4)   | Cu2-N2     | 2.018(4)   |
| Cu2-N6      | 1.966(4)   | Cu2-N8B    | 2.008(4)   |
| O1-Cu1-O7   | 175.02(16) | O1-Cu1-O9  | 92.86(18)  |
| O1-Cu1-N4A  | 90.21(15)  | O1-Cu1-N7  | 81.91(15)  |
| O7-Cu1-O9   | 90.24(18)  | O7-Cu1-N4A | 93.25(16)  |
| O7-Cu1-N7   | 94.23(16)  | O9-Cu1-N4A | 97.44(17)  |
| O9-Cu1-N7   | 89.46(17)  | N4A-Cu1-N7 | 169.80(17) |
| O3-Cu2-O5B  | 118.6(2)   | O3-Cu2-N2  | 92.1(3)    |
| O3-Cu2-N6   | 96.79(18)  | O3-Cu2-N8B | 89.01(18)  |
| O5B-Cu2-N2  | 148.9(3)   | O5B-Cu2-N6 | 90.73(17)  |
| O5B-Cu2-N8B | 81.04(17)  | N2-Cu2-N6  | 90.9(2)    |
| N2-Cu2-N8B  | 95.1(2)    | N6-Cu2-N8B | 171.51(18) |

Symmetry transformations used to generate equivalent atoms: A  $x, -1+y, z$ ; B  $2-x, -y, 1-z$ ; C  $1+x, -1+y, z$  for **1**; A  $-x, 1-y, 1-z$ ; B  $1-x, -y, -z$ ; C  $1-x, -y, 1-z$ ; D  $x, y, -1+z$  for **2**; A  $-x+1, -y+1, -z+1$ ; B  $-x, -y, -z+1$ ; C  $x, y, z+1$  for **3**; A  $1-x, 1-y, 1-z$  for **4**; A  $-x, -y+3, -z+1$ ; B  $x, y-1, z$  for **5**

**Table S3.** Hydrogen bonds for **1** and **5** (Å and °).

| D-H...A                        | d(D-H)    | d(H...A) | D(D...A)  | <(DHA)  |
|--------------------------------|-----------|----------|-----------|---------|
| <b>1</b>                       |           |          |           |         |
| O(7)-H(1W)...O(4)              | 0.88(2)   | 1.93(3)  | 2.781(4)  | 164(6)  |
| O(8)-H(2W)...O(9) <sup>i</sup> | 0.841(19) | 2.03(2)  | 2.865(6)  | 172(6)  |
| O(8)-H(3W)...O(6)              | 0.85(2)   | 1.90(3)  | 2.692(5)  | 156(5)  |
| O(9)-H(4W)...O(6)              | 0.89(2)   | 1.90(3)  | 2.784(6)  | 168(7)  |
| <b>5</b>                       |           |          |           |         |
| O(9)-H(1W)...O(1) <sup>i</sup> | 0.89(2)   | 2.06(4)  | 2.877(6)  | 153(7)  |
| O(9)-H(2W)...O(12)             | 0.90(2)   | 1.75(3)  | 2.619(17) | 163(6)  |
| O(10)-H(4W)...O(5)             | 0.92(2)   | 2.33(5)  | 3.198(11) | 157(11) |

Symmetry transformations used to generate equivalent atoms:  $i -x+2, -y, -z+2$  for **1**;  $i -x, -y+4, -z+1$  for **5**.

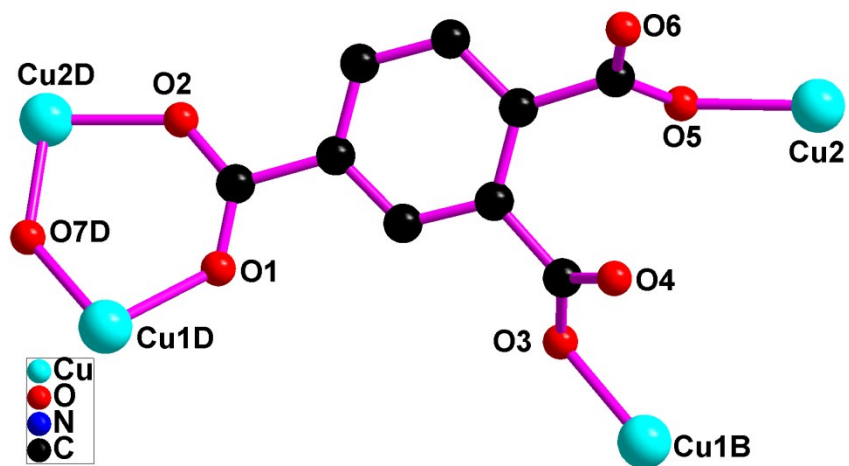

Fig. S1 Each 1,2,4-btc ligand connects four Cu(II) atoms in **1**.

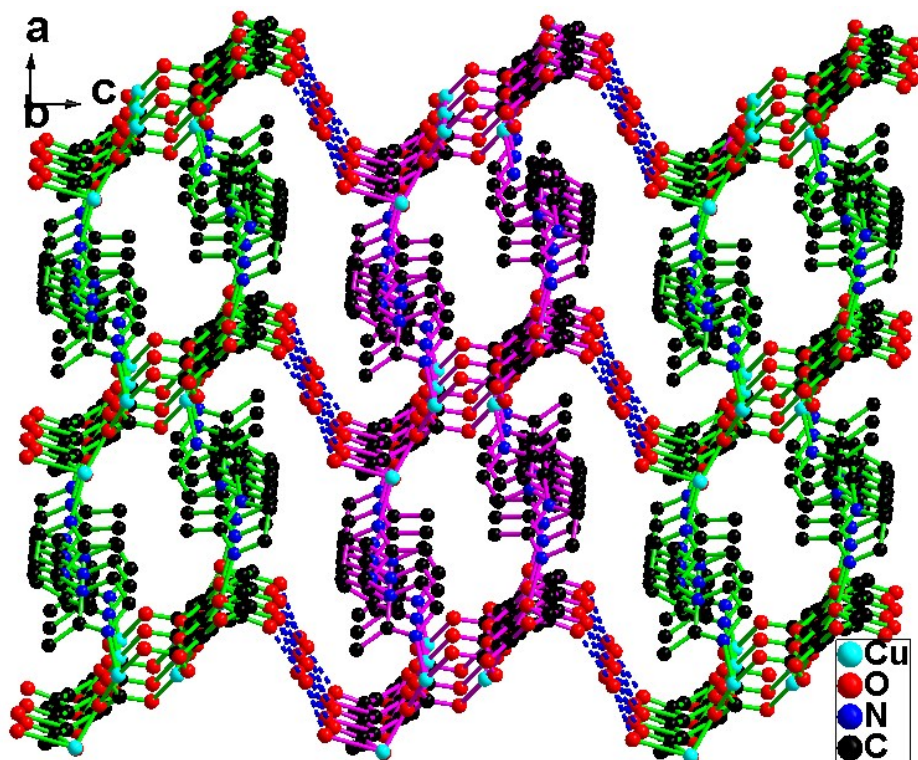

Fig. S2 The 3D hydrogen bonding network in **1**.

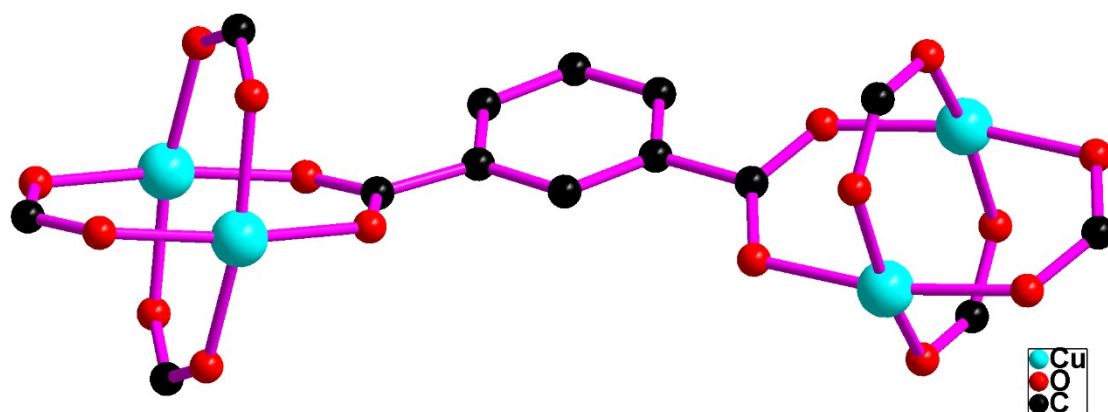

Fig. S3 The coordination mode of ip ligand in **2**.

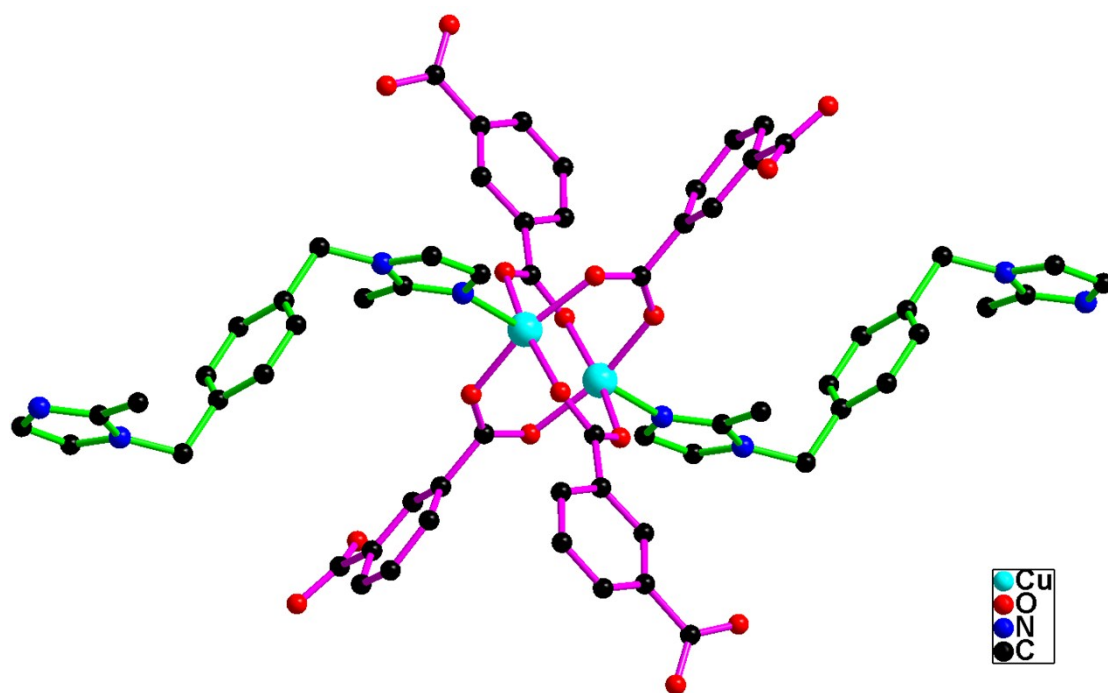

Fig. S4 The 6-connected  $[\text{Cu}_2(\text{COO})_4]$  dimer in **2**.

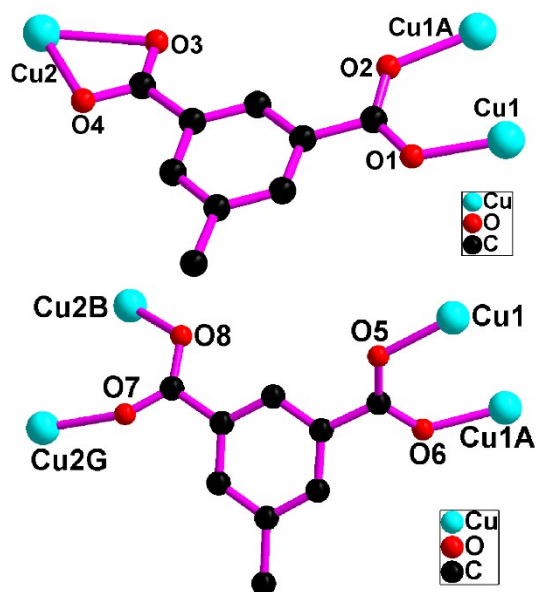

Fig. S5 The coordination mode of two kinds of Meip ligands in **3**.

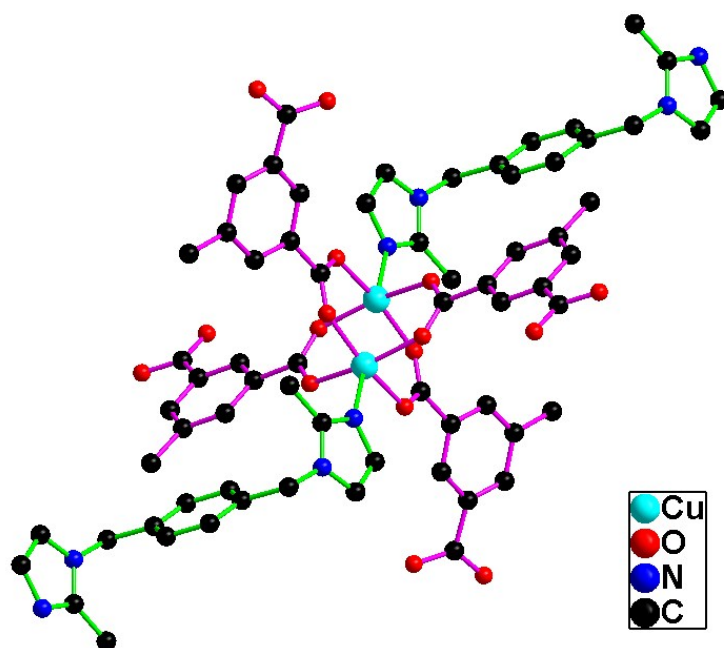

Fig. S6 The 6-connected  $[\text{Cu}_2(\text{COO})_4]$  dimer in **3**.

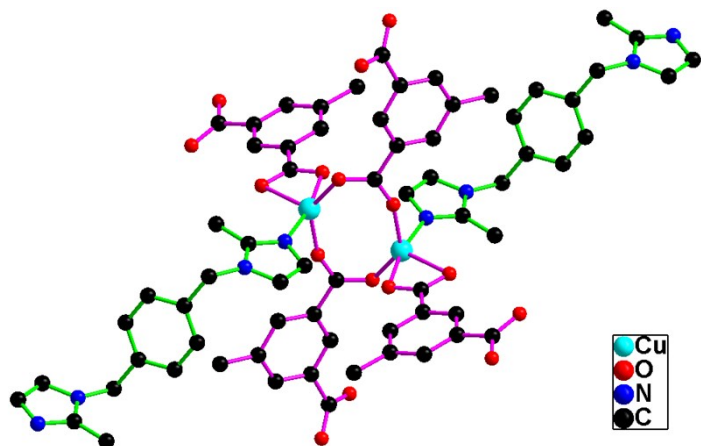

Fig. S7 The 6-connected  $[\text{Cu}_2(\text{COO})_2]$  dimer in 3.

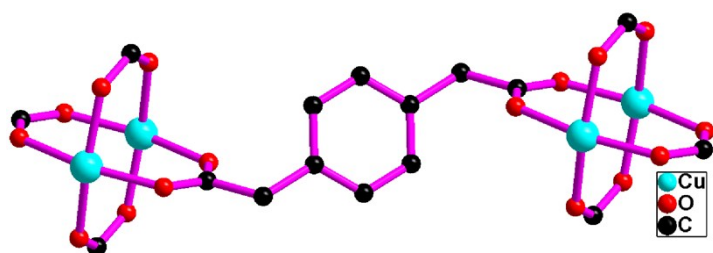

Fig. S8 The coordination mode of pbda ligand in 4.

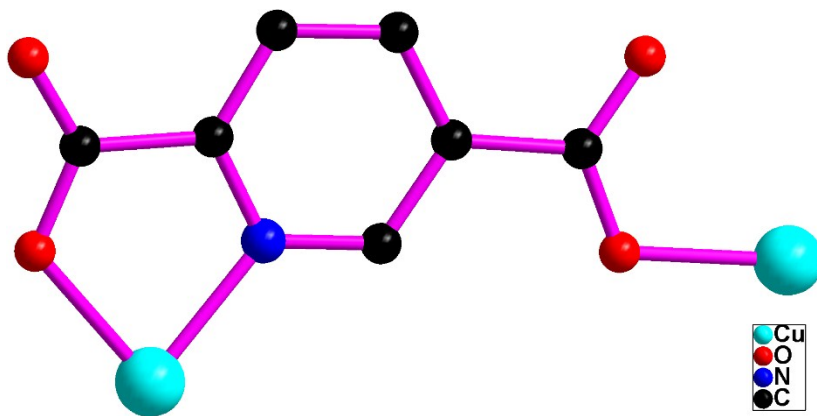

Fig. S9 The coordination mode of 2,5-pydc ligand in 5.



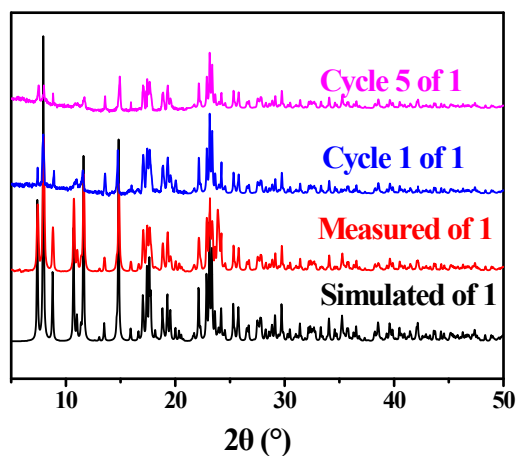

**Fig. S10** PXRd patterns of the measured, simulated and after photocatalytic degradation of the MO solution of **1** for example.

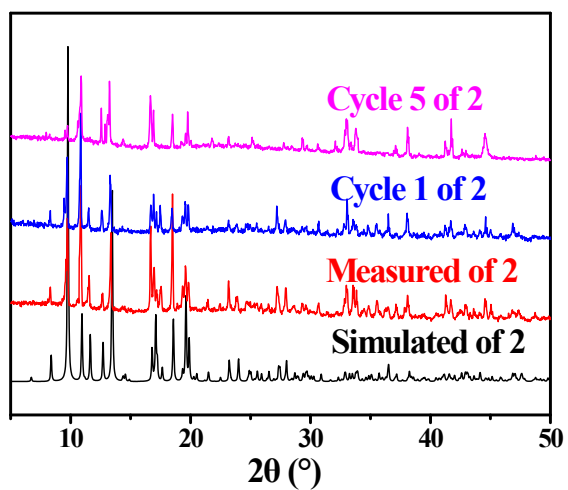

**Fig. S11** PXRd patterns of the measured, simulated and after photocatalytic degradation of the MO solution of **2** for example.

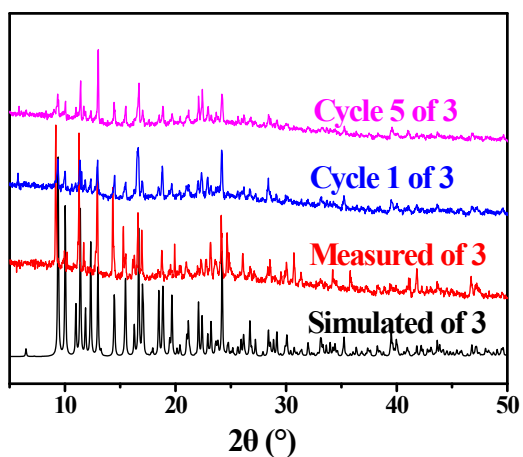

**Fig. S12** PXR D patterns of the measured, simulated and after photocatalytic degradation of the MO solution of **3** for example.

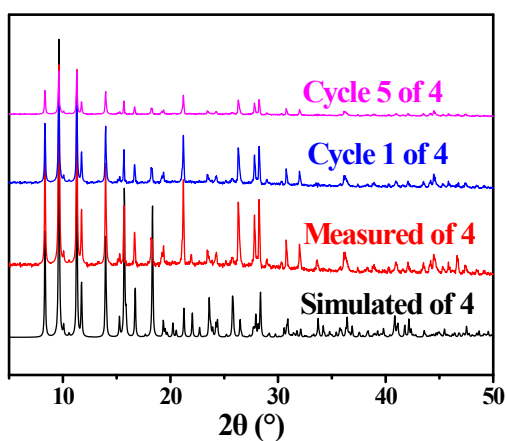

**Fig. S13** PXR D patterns of the measured, simulated and after photocatalytic degradation of the MO solution of **4** for example.

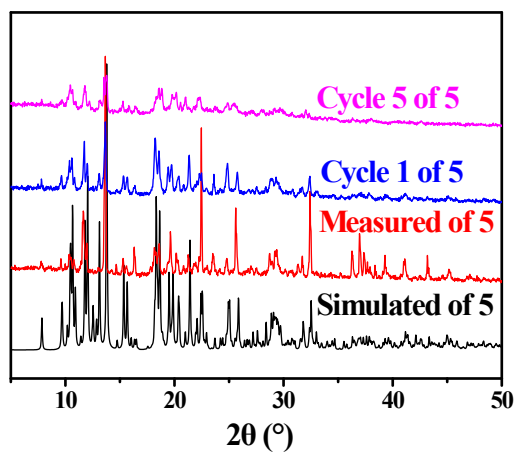

**Fig. S14** PXRD patterns of the measured, simulated and after photocatalytic degradation of the MO solution of **5** for example.

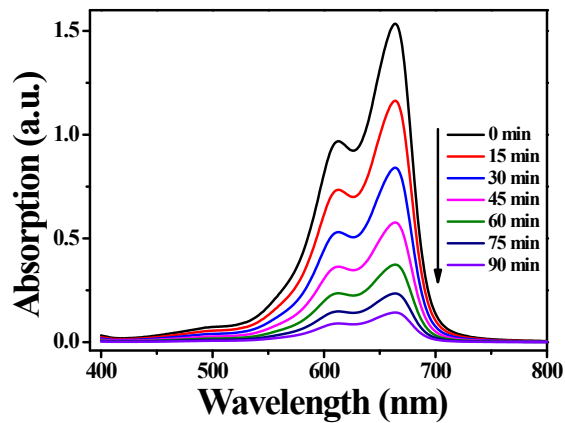

**Fig. S15** The UV-vis absorption spectra of MB solution during photocatalytic degradation of the MB solution using catalyst **2** in the presence of  $\text{H}_2\text{O}_2$  under visible light irradiation.

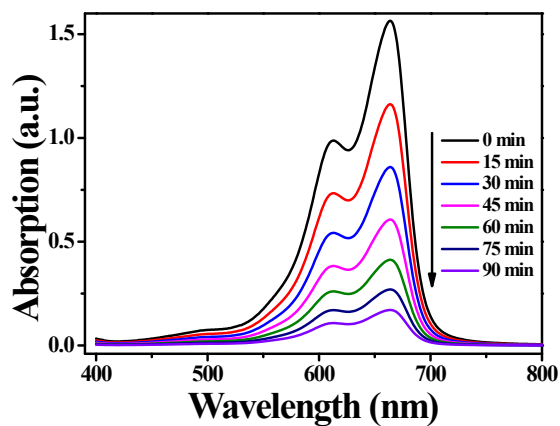

**Fig. S16** The UV-vis absorption spectra of MB solution during photocatalytic degradation of the MB solution using catalyst **3** in the presence of  $\text{H}_2\text{O}_2$  under visible light irradiation.

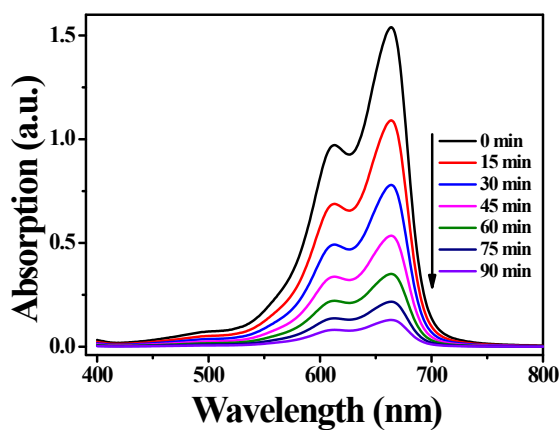

**Fig. S17** The UV-vis absorption spectra of MB solution during photocatalytic degradation of the MB solution using catalyst **4** in the presence of  $\text{H}_2\text{O}_2$  under visible light irradiation.

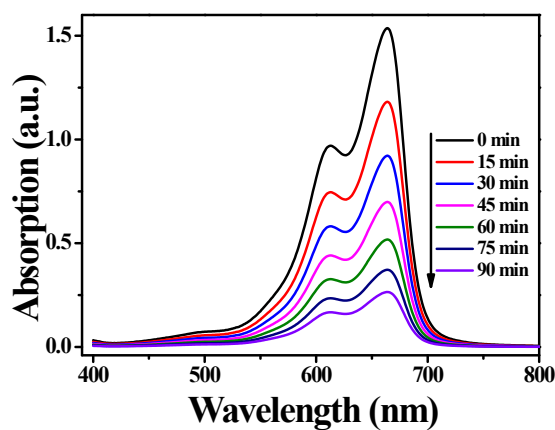

**Fig. S18** The UV-vis absorption spectra of MB solution during photocatalytic degradation of the MB solution using catalyst **5** in the presence of  $\text{H}_2\text{O}_2$  under visible light irradiation.

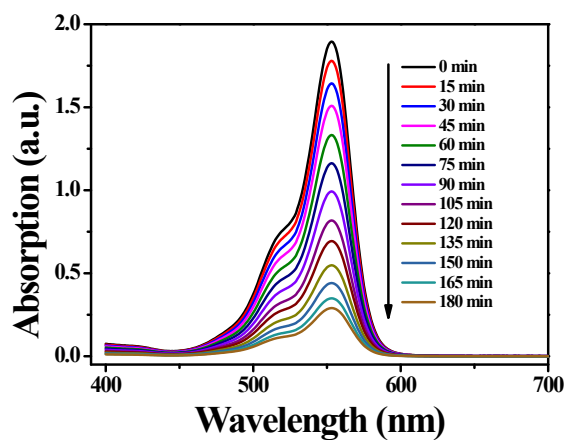

**Fig. S19** The UV-vis absorption spectra of RhB solution during photocatalytic degradation of the RhB solution using catalyst **2** in the presence of  $\text{H}_2\text{O}_2$  under visible light irradiation.

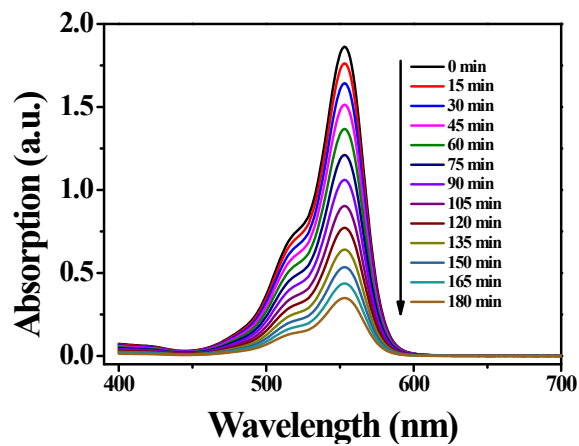

Fig. S20 The UV-vis absorption spectra of RhB solution during photocatalytic degradation of the RhB solution using catalyst **3** in the presence of  $H_2O_2$  under visible light irradiation

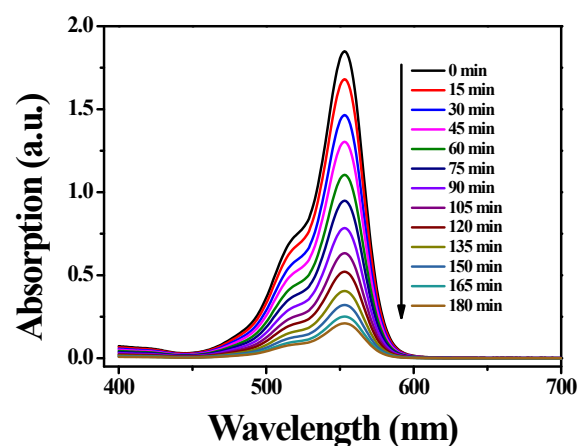

Fig. S21 The UV-vis absorption spectra of RhB solution during photocatalytic degradation of the RhB solution using catalyst **4** in the presence of  $H_2O_2$  under visible light irradiation

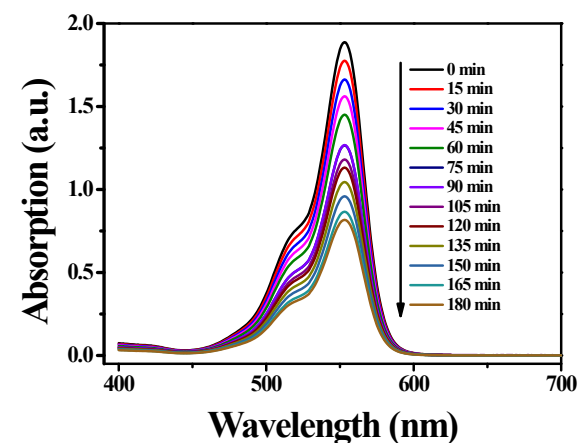

**Fig. S22** The UV-vis absorption spectra of RhB solution during photocatalytic degradation of the RhB solution using catalyst **5** in the presence of  $H_2O_2$  under visible light irradiation

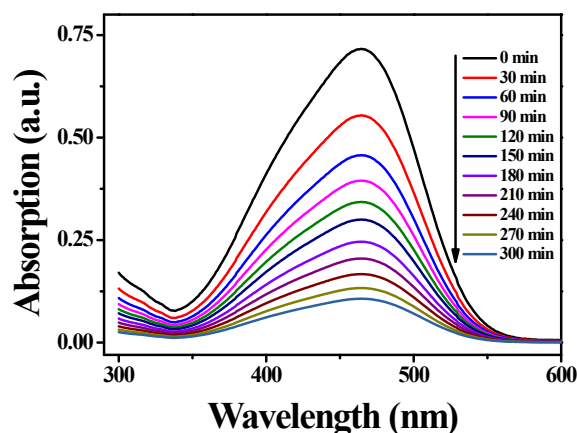

**Fig. S23** The UV-vis absorption spectra of MO solution during photocatalytic degradation of the MO solution using catalyst **2** in the presence of  $H_2O_2$  under visible light irradiation

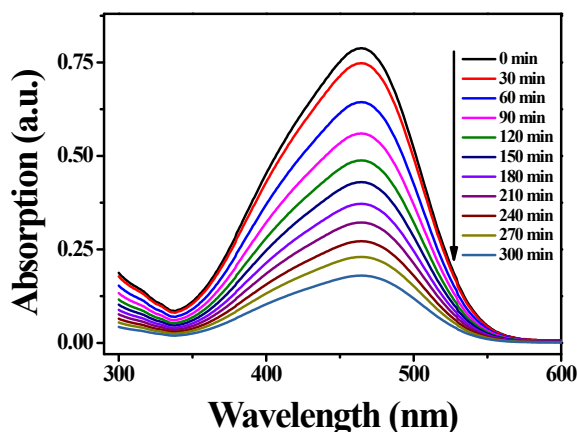

**Fig. S24** The UV-vis absorption spectra of MO solution during photocatalytic degradation of the MO solution using catalyst **3** in the presence of  $H_2O_2$  under visible light irradiation

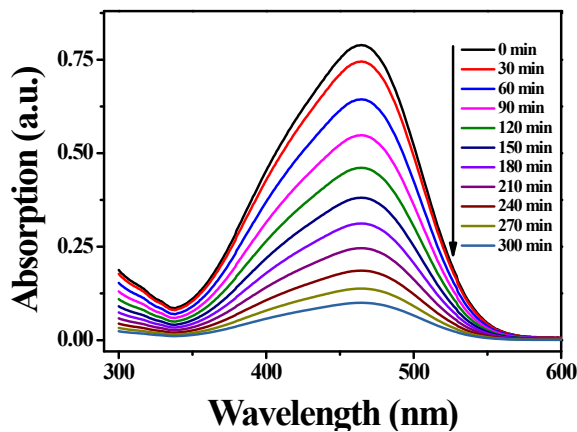

**Fig. S25** The UV-vis absorption spectra of MO solution during photocatalytic degradation of the MO solution using catalyst **4** in the presence of H<sub>2</sub>O<sub>2</sub> under visible light irradiation

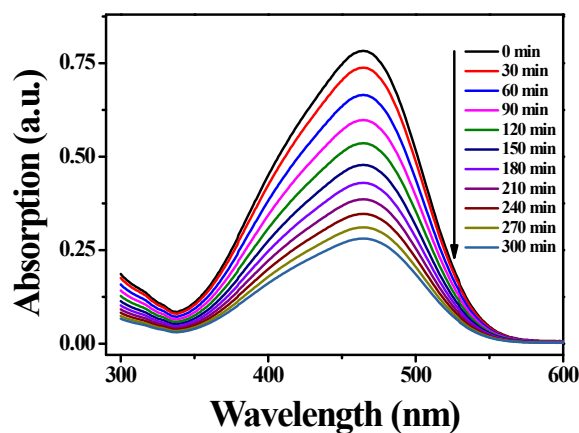

**Fig. S26** The UV-vis absorption spectra of MO solution during photocatalytic degradation of the MO solution using catalyst **5** in the presence of H<sub>2</sub>O<sub>2</sub> under visible light irradiation

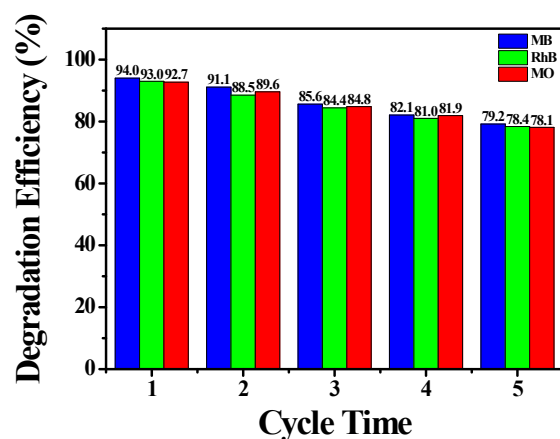

**Fig. S27** Photocatalytic efficiencies of degradation of MB, RhB and MO using catalysts **1** in the presence of H<sub>2</sub>O<sub>2</sub> under visible light irradiation in catalytic cycle 1 to cycle 5.

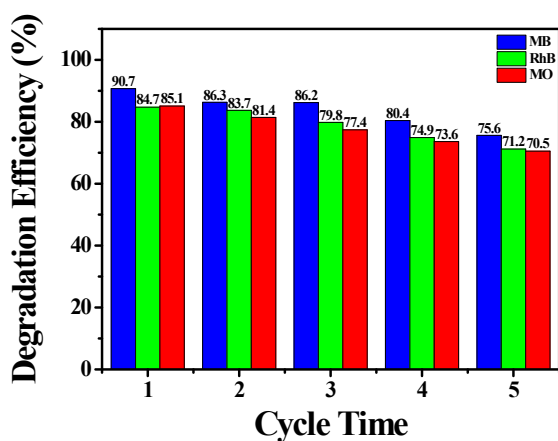

Fig. S28 Photocatalytic efficiencies of degradation of MB, RhB and MO using catalysts **2** in the presence of  $H_2O_2$  under visible light irradiation in catalytic cycle 1 to cycle 5.

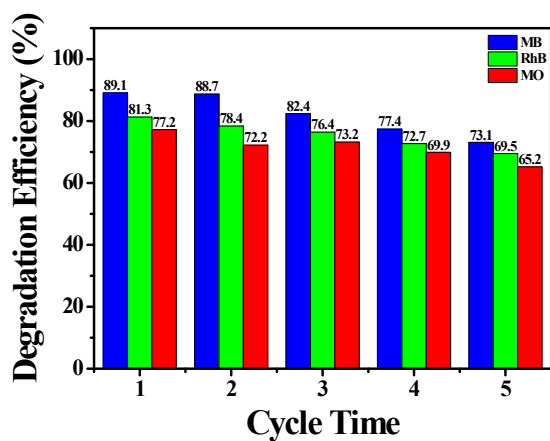

Fig. S29 Photocatalytic efficiencies of degradation of MB, RhB and MO using catalysts **3** in the presence of  $H_2O_2$  under visible light irradiation in catalytic cycle 1 to cycle 5.

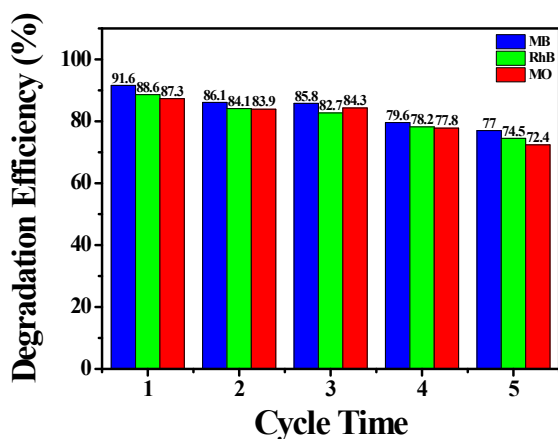

Fig. S30 Photocatalytic efficiencies of degradation of MB, RhB and MO using catalysts **4** in the presence of  $H_2O_2$  under visible light irradiation in catalytic cycle 1 to cycle 5.



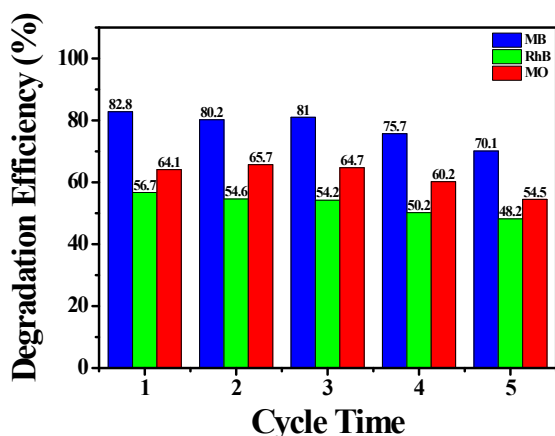

Fig. S31 Photocatalytic efficiencies of degradation of MB, RhB and MO using catalysts **5** in the presence of  $H_2O_2$  under visible light irradiation in catalytic cycle 1 to cycle 5.

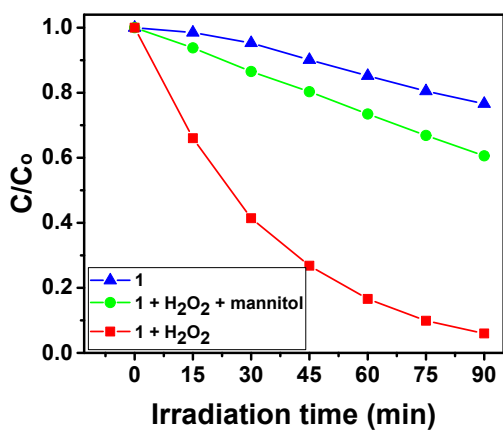

Fig. S32 Concentration changes of MB as a function of reaction time using catalyst **1** in the absence of  $H_2O_2$ , in the presence of  $H_2O_2$ , and in the presence of  $H_2O_2$  and good hydroxyl radical ( $\cdot OH$ ) scavenger mannitol under visible light irradiation.

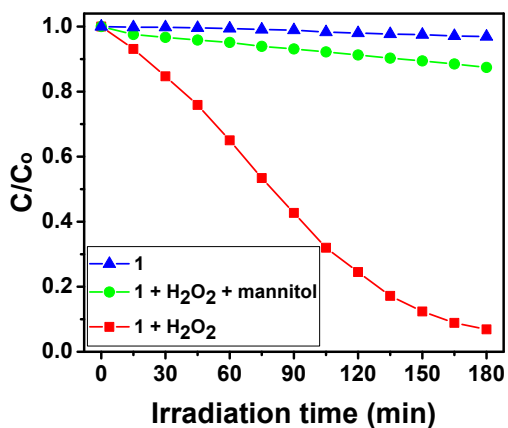

**Fig. S33** Concentration changes of RhB as a function of reaction time using catalyst **1** in the absence of  $\text{H}_2\text{O}_2$ , in the presence of  $\text{H}_2\text{O}_2$ , and in the presence of  $\text{H}_2\text{O}_2$  and good hydroxyl radical ( $\cdot\text{OH}$ ) scavenger mannitol under visible light irradiation.

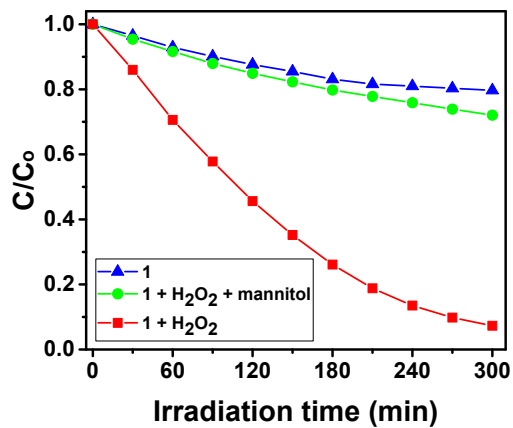

**Fig. S34** Concentration changes of MO as a function of reaction time using catalyst **1** in the absence of  $\text{H}_2\text{O}_2$ , in the presence of  $\text{H}_2\text{O}_2$ , and in the presence of  $\text{H}_2\text{O}_2$  and good hydroxyl radical ( $\cdot\text{OH}$ ) scavenger mannitol under visible light irradiation.
